# Supplementary material
Source: publisher site journal article supplement (https://www.dovepress.com/article/414022)
Supplement: Supplementary file 1 [file get_supplementary_file.php]

### Supplemental Figure 1: Standardized Assessment Tool for Video Review

|                                                                                                                                                                              |                                                                                                                                                                                                                                                   |  |  |                                                                                              |                                                                                                             |  |  |
|------------------------------------------------------------------------------------------------------------------------------------------------------------------------------|---------------------------------------------------------------------------------------------------------------------------------------------------------------------------------------------------------------------------------------------------|--|--|----------------------------------------------------------------------------------------------|-------------------------------------------------------------------------------------------------------------|--|--|
| Reviewer                                                                                                                                                                     |                                                                                                                                                                                                                                                   |  |  | Date of Review                                                                               |                                                                                                             |  |  |
| Program                                                                                                                                                                      | <input type="checkbox"/> Ped <input type="checkbox"/> Med/Ped <input type="checkbox"/> Ped/Genetics <input type="checkbox"/> Ped/Neurology <input type="checkbox"/> Ped/PM&R <input type="checkbox"/> Triple Board <input type="checkbox"/> Other |  |  |                                                                                              |                                                                                                             |  |  |
| Date/Time of Visit                                                                                                                                                           |                                                                                                                                                                                                                                                   |  |  | Resident Year                                                                                | <input type="checkbox"/> PL2 <input type="checkbox"/> PL3 <input type="checkbox"/> PL4                      |  |  |
| Video #                                                                                                                                                                      |                                                                                                                                                                                                                                                   |  |  | STS                                                                                          | <input type="checkbox"/> 1 <input type="checkbox"/> 2 <input type="checkbox"/> 3 <input type="checkbox"/> 4 |  |  |
| Which Physician participated in the RCPA? (check all that apply?)                                                                                                            | Did another non-resident physician interrupt/preclude the resident performance of the RCPA?                                                                                                                                                       |  |  | Was the RCPA interrupted or precluded by another intervention? Monitors, IV, exposure etc... |                                                                                                             |  |  |
|                                                                                                                                                                              | <i>Resident is moved away from patient and does not participate</i>                                                                                                                                                                               |  |  |                                                                                              |                                                                                                             |  |  |
| <input type="checkbox"/> Attending/3 <sup>rd</sup> Year Fellow<br><input type="checkbox"/> 1 <sup>st</sup> /2 <sup>nd</sup> Year Fellow<br><input type="checkbox"/> Resident | <input type="checkbox"/> Yes – Attending<br><input type="checkbox"/> Yes – Fellow<br><input type="checkbox"/> No                                                                                                                                  |  |  | <input type="checkbox"/> Yes<br><input type="checkbox"/> No                                  |                                                                                                             |  |  |

| Physical Exam Assessment                                                                                                                                                   |                                                                                                                                                                               |          |
|----------------------------------------------------------------------------------------------------------------------------------------------------------------------------|-------------------------------------------------------------------------------------------------------------------------------------------------------------------------------|----------|
| Exam                                                                                                                                                                       |                                                                                                                                                                               | Comments |
| <b>Pulses</b><br><i>The resident palpates central and/or peripheral pulses and reports the findings to the team leader (check all that apply)</i>                          | <u>Exam</u><br><input type="checkbox"/> Yes<br><input type="checkbox"/> No                                                                                                    |          |
|                                                                                                                                                                            | <u>Report</u><br><input type="checkbox"/> Normal<br><input type="checkbox"/> Abnormal<br><input type="checkbox"/> Not reported<br><input type="checkbox"/> Unclear from video |          |
| <b>Capillary Refill</b><br><i>The resident checks for capillary refill and reports the findings to the team leader (check all that apply)</i>                              | <u>Exam</u><br><input type="checkbox"/> Yes<br><input type="checkbox"/> No                                                                                                    |          |
|                                                                                                                                                                            | <u>Report</u><br><input type="checkbox"/> Normal<br><input type="checkbox"/> Abnormal<br><input type="checkbox"/> Not reported<br><input type="checkbox"/> Unclear from video |          |
| <b>Mental Status</b><br><i>The resident describes the mental status, including normal, altered, depressed, and/or reports GCS</i>                                          | <u>Exam</u><br><input type="checkbox"/> Yes<br><input type="checkbox"/> No                                                                                                    |          |
|                                                                                                                                                                            | <u>Report</u><br><input type="checkbox"/> Normal<br><input type="checkbox"/> Abnormal<br><input type="checkbox"/> Not reported<br><input type="checkbox"/> Unclear from video |          |
| <b>Skin</b><br><i>The resident visibly palpates/inspects the skin for color and temperature and reports findings. Findings include normal, warm, cold, cyanotic, pale.</i> | <u>Exam</u><br><input type="checkbox"/> Yes<br><input type="checkbox"/> No                                                                                                    |          |
|                                                                                                                                                                            | <u>Report</u><br><input type="checkbox"/> Normal<br><input type="checkbox"/> Abnormal<br><input type="checkbox"/> Not reported<br><input type="checkbox"/> Unclear from video |          |

## Verbalized Perfusion Assessment

Choose one of the following to describe the resident's verbal assessment of the patient's circulatory status

| <input type="checkbox"/> No Circulatory assessment verbalized                                                             |                                                                                                                                                                      | Comments |
|---------------------------------------------------------------------------------------------------------------------------|----------------------------------------------------------------------------------------------------------------------------------------------------------------------|----------|
| <b>Normal</b><br><i>The resident describes the circulation as normal, includes good/normal perfusion</i>                  | <input type="checkbox"/> Yes                                                                                                                                         |          |
| <b>Shock</b><br><i>The resident describes the patient as being shock and may specify compensated versus uncompensated</i> | <input type="checkbox"/> Yes<br><input type="checkbox"/> Compensated<br><input type="checkbox"/> Decompensated/Hypotensive<br><input type="checkbox"/> Not specified |          |
| <b>Arrest</b><br><i>The resident describes the patient as being in cardiac arrest</i>                                     | <input type="checkbox"/> Yes                                                                                                                                         |          |

## Perfusion Assessment Completion

| Were 3 of 4 components of the perfusion exam completed?     | Was an assessment verbalized?                               | Comments |
|-------------------------------------------------------------|-------------------------------------------------------------|----------|
| <input type="checkbox"/> Yes<br><input type="checkbox"/> No | <input type="checkbox"/> Yes<br><input type="checkbox"/> No |          |

## Comments

## Supplemental Figure 2:

### Side effect questionnaire

|                            | None | Mild | Moderate | Severe |
|----------------------------|------|------|----------|--------|
| General Discomfort         | 0    | 0    | 0        | 0      |
| Fatigue                    | 0    | 0    | 0        | 0      |
| Headache                   | 0    | 0    | 0        | 0      |
| Eye Strain                 | 0    | 0    | 0        | 0      |
| Difficulty focusing        | 0    | 0    | 0        | 0      |
| Salivation increasing      | 0    | 0    | 0        | 0      |
| Sweating                   | 0    | 0    | 0        | 0      |
| Nausea                     | 0    | 0    | 0        | 0      |
| Difficulty concentrating   | 0    | 0    | 0        | 0      |
| Fullness of the head       | 0    | 0    | 0        | 0      |
| Blurred vision             | 0    | 0    | 0        | 0      |
| Dizziness with eyes open   | 0    | 0    | 0        | 0      |
| Dizziness with eyes closed | 0    | 0    | 0        | 0      |
| Vertigo*                   | 0    | 0    | 0        | 0      |
| Stomach awareness**        | 0    | 0    | 0        | 0      |
| Burping                    | 0    | 0    | 0        | 0      |

\*Vertigo is experienced as loss of orientation with respect to being upright

\*\*Stomach awareness is a feeling of discomfort but is just short of nausea.
